# Supplementary material for: The Transcriptome of the Salivary Glands of Amblyomma aureolatum Reveals the Antimicrobial Peptide Microplusin as an Important Factor for the Tick Protection Against Rickettsia rickettsii Infection
Source: Front Physiol. 2019 May 3;10:529. doi: 10.3389/fphys.2019.00529 (PMC6509419; doi:10.3389/fphys.2019.00529)
Supplement: Supplementary file 3 [file Table_3.XLSX]

## Sheet: Planilha1
Supplementary table 3. Primers used in RT-qPCR and RNAi experiments.
ID	Comments	Oligonucleotide sense	Oligonucleotide antisense
AMBAUR-69859	Microplusin	GGAGCTATGCAAGAAGACCG	CCTTCGCACATCTTACGGAT
AMBAUR-60175	Cytochrome P450	GCTGTGGTGAAGAGCCAAA	ACCGCTGGTGGGTAAAGTC
AMBARSIGP-5190	Alpha-macroglobulin	CCGAATACTGCTGCTTGACA	GATGAACTGCTGCTGGAACA
AMBAUR-19862	5.3 kDa antibacterial peptide	AGCTGCGACACCAAACAAC	CTACGCAGCGTGTGCATC
AMBARSIGP-22173	Microplusin	GAGTTTAACACCCGCTTGGA	TTCCGCAGAAAGGTCACTTC
AMBARSIGP-47654	Lipocalin-2	TGCGAGCGAGACATCAGA	TTCATCAAAGCCCAGGACA
AMBAUR-54200	Secreted protein	ATGCCGTGCAACACAGAATA	CCTGGAGTTACATTCCGCAT
AMBAUR-6577	8.9 kDa Family	AGTTTCCATGAACCGTGCGA	AGCAGCATCCACCGTAAACT
AMBAUR-47378	Basic tail (BT) 4	GGAGAAAACAGCGGATGGTA	GGAATGATGGTTGTGTCGGT
AMBAUR-4333	Salivary secreted protein of 21.3 kDa	GCTATCACCACTGTCGCTCA	GGTGGTGTGAACCTTGGTCA
AMBARSIGP-70152	Secreted BT	TGAACAACTGGGGATGGTGG	TTTGTGCGGTAGCCTTGAGT
	Ribosomal protein S3A	TACCTGCTGCGAATGTTCTG	TTCTTCCTGATGAGGCGAAC
	Microplusin (Ambaur-69859) - silencing confirmation	TCAGTGACCACTCACCATGAA	CGGTCTTCTTGCATAGCTCCAG
	dsMicroplusin (Ambaur-69859)*	TAATACGACTCACTATAGGGTCTTCGCCTCCTGTCTGTT	TAATACGACTCACTATAGGGTGGTCATGACTGTGGTCGT
	dsMSP1*	TAATACGACTCACTATAGGCTGATGCAAGCGATTCAGAT	TAATACGACTCACTATAGGGTGTATTTCCAGAATTGGCC
* Oligonucleotides coupled to the T7 tail (underlined) used for dsRNA synthesis.
